# Supplementary material for: New Nanostructured Materials Based on Mesoporous Silica Loaded with Ru(II)/Ru(III) Complexes with Anticancer and Antimicrobial Properties
Source: MDPI journal article supplement (doi:10.3390/pharmaceutics15051458), 2023-05-10
Supplement: s1 [file pharmaceutics-2317121-SI.pdf › pharmaceutics-2317121-SI.pdf]

# Supplementary Materials: New nanostructured materials based on mesoporous silica loaded with Ru(II)/Ru(III) complexes with anticancer and antimicrobial properties

Gabriela Marinescu, Daniela C. Culita, Teodora Mocanu, Raul-Augustin Mitran, Simona Petrescu, Miruna S. Stan, Mariana C. Chifiriuc and Marcela Popa

## Electronic Supplementary Information:

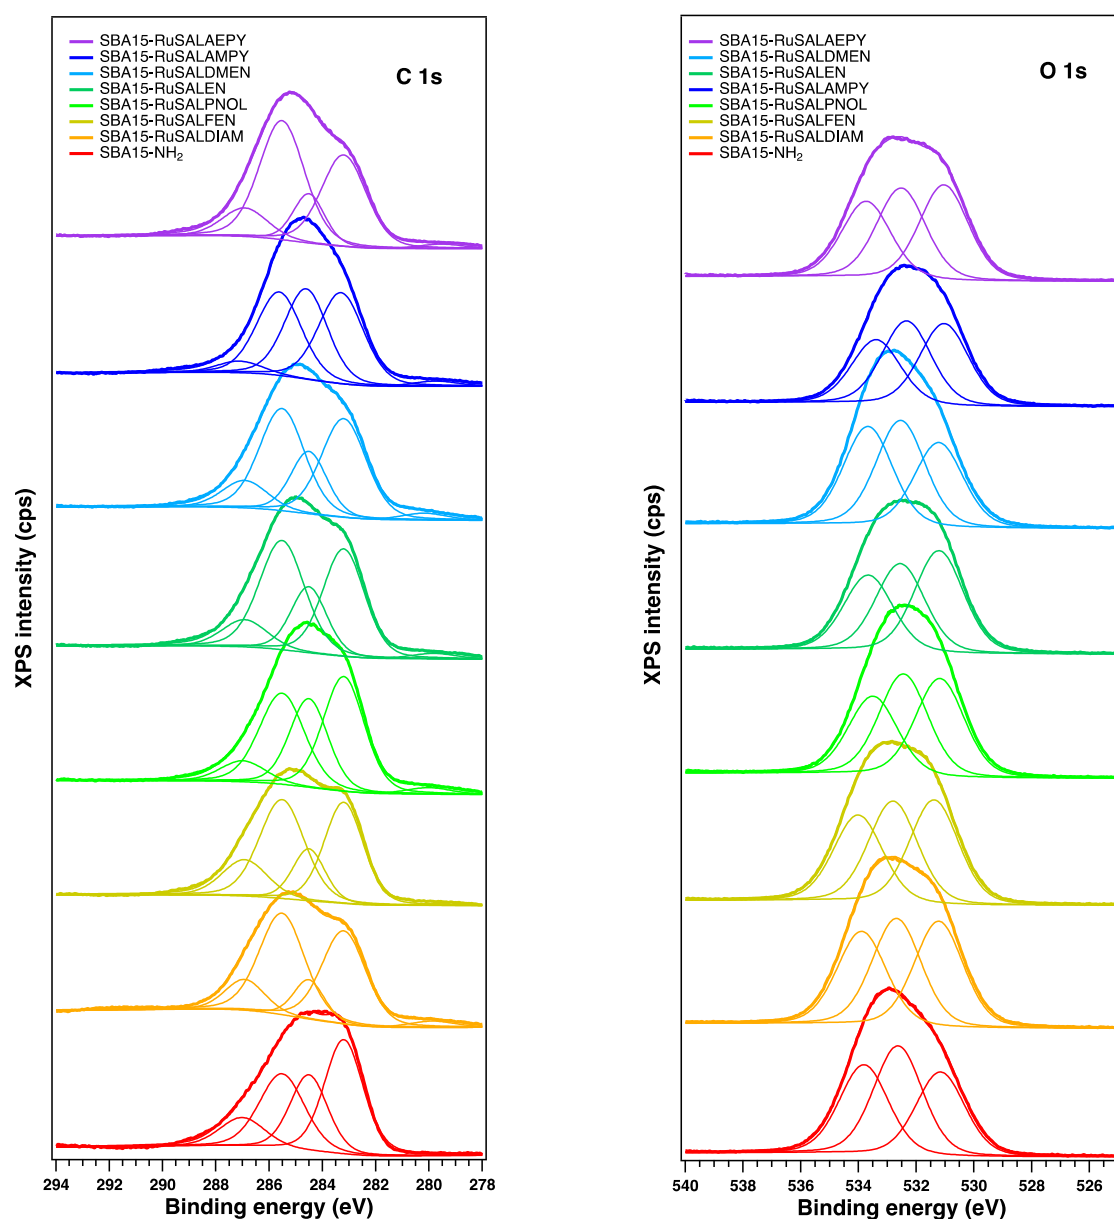

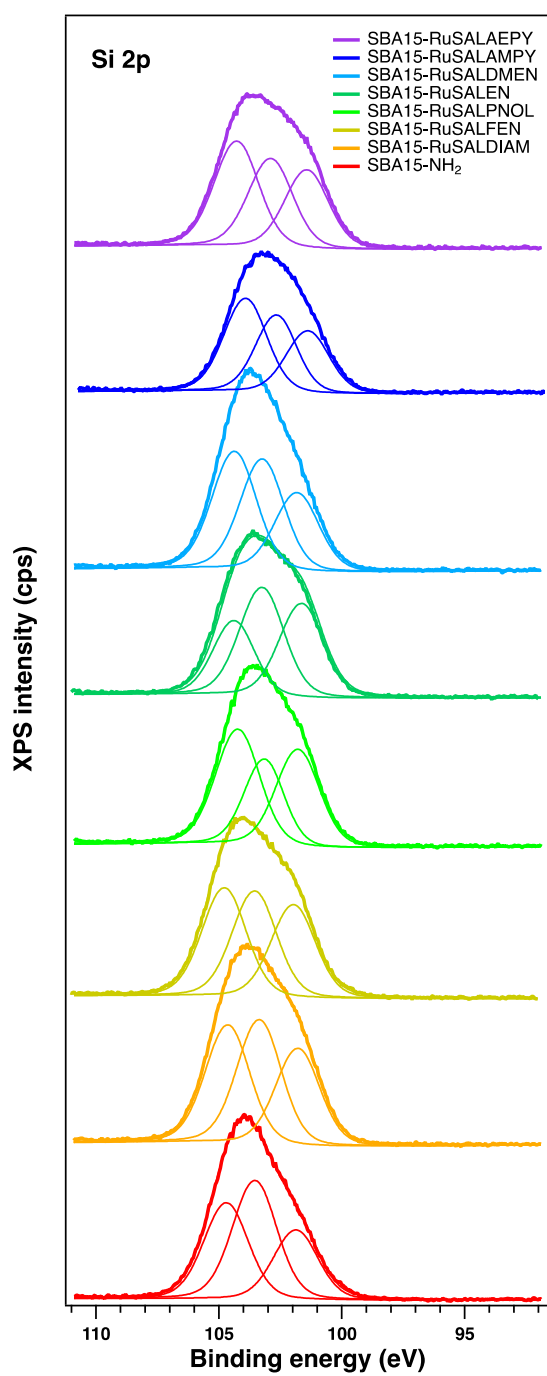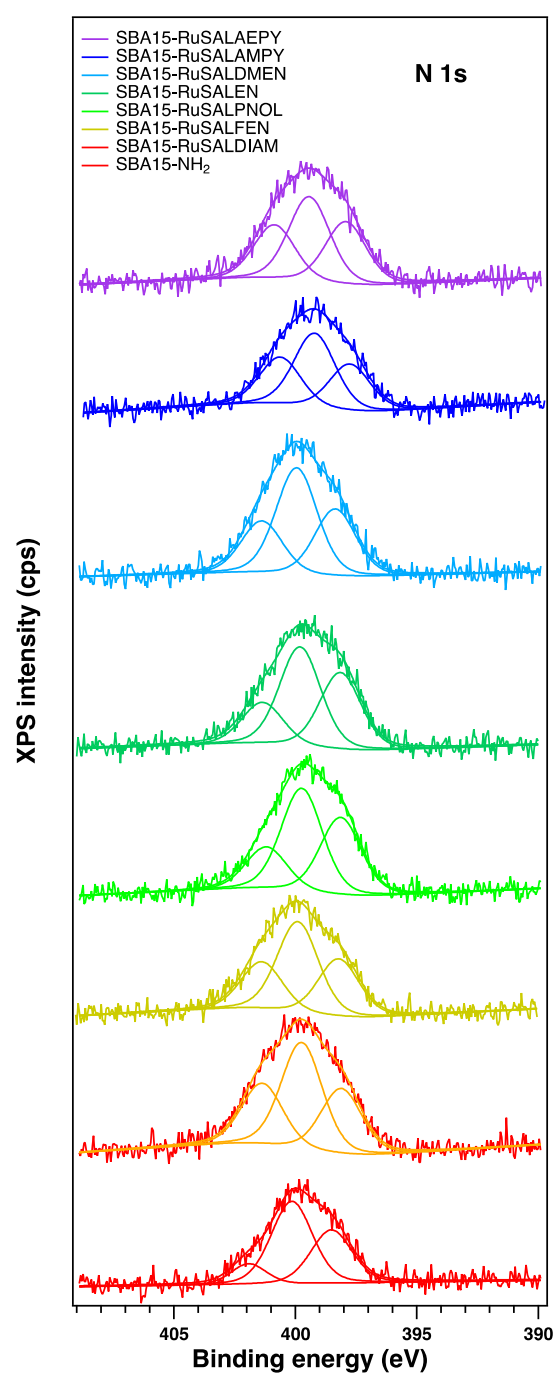

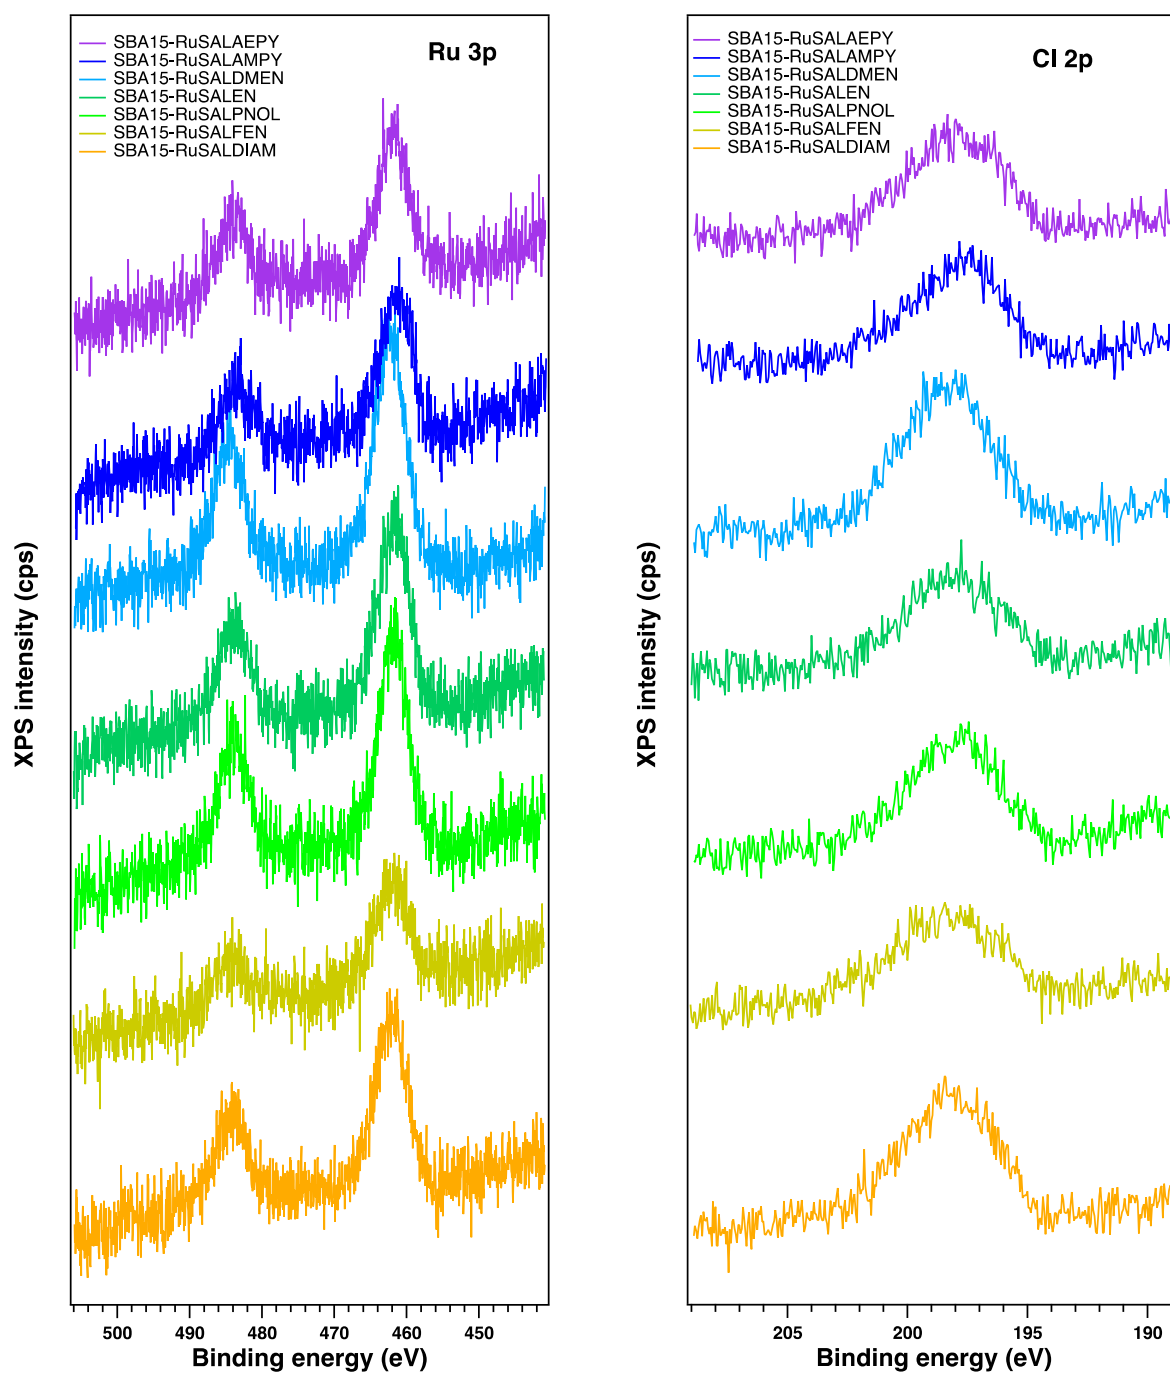

**Figure S1.** C 1s, O 1s, Si 2p, N 1s, Ru 3p, and Cl 2p deconvoluted photoelectron spectra for the investigated samples.

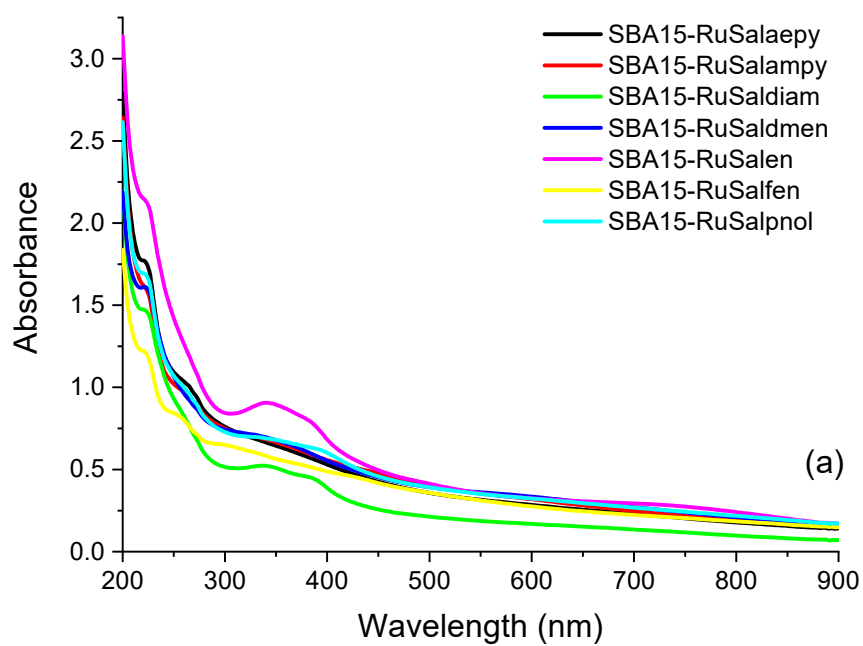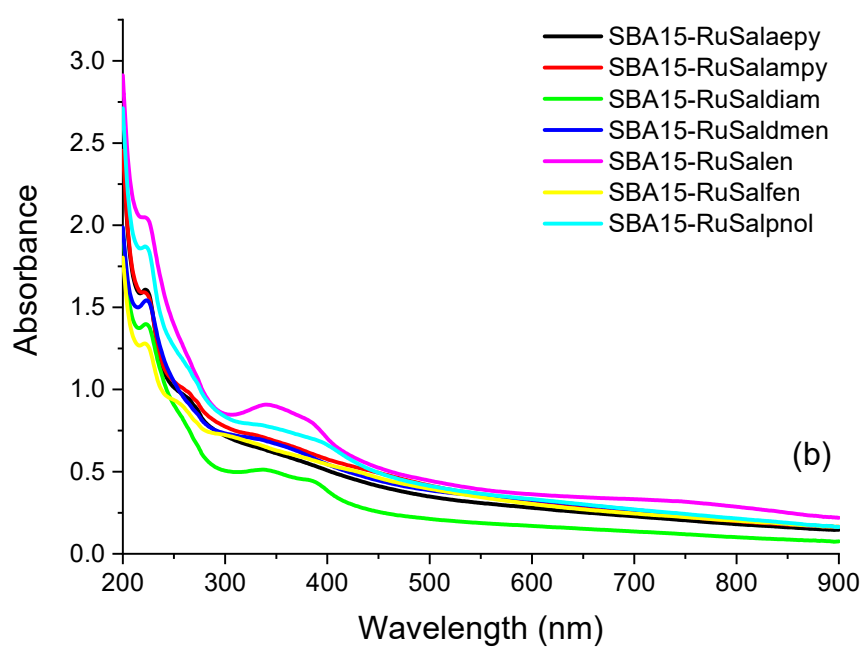

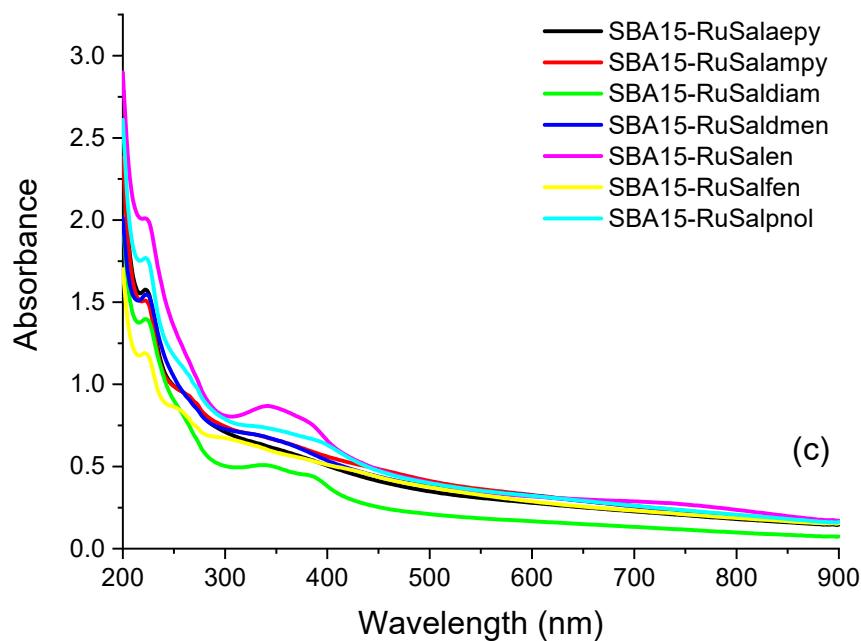

**Figure S2.** UV-Vis spectra of the investigated mesoporous silica functionalized with Ru(II) and Ru(III) complexes in aqueous solution (250 µg/ml): (a) immediately after preparation; (b) after 24 h; (c) after 72 h.

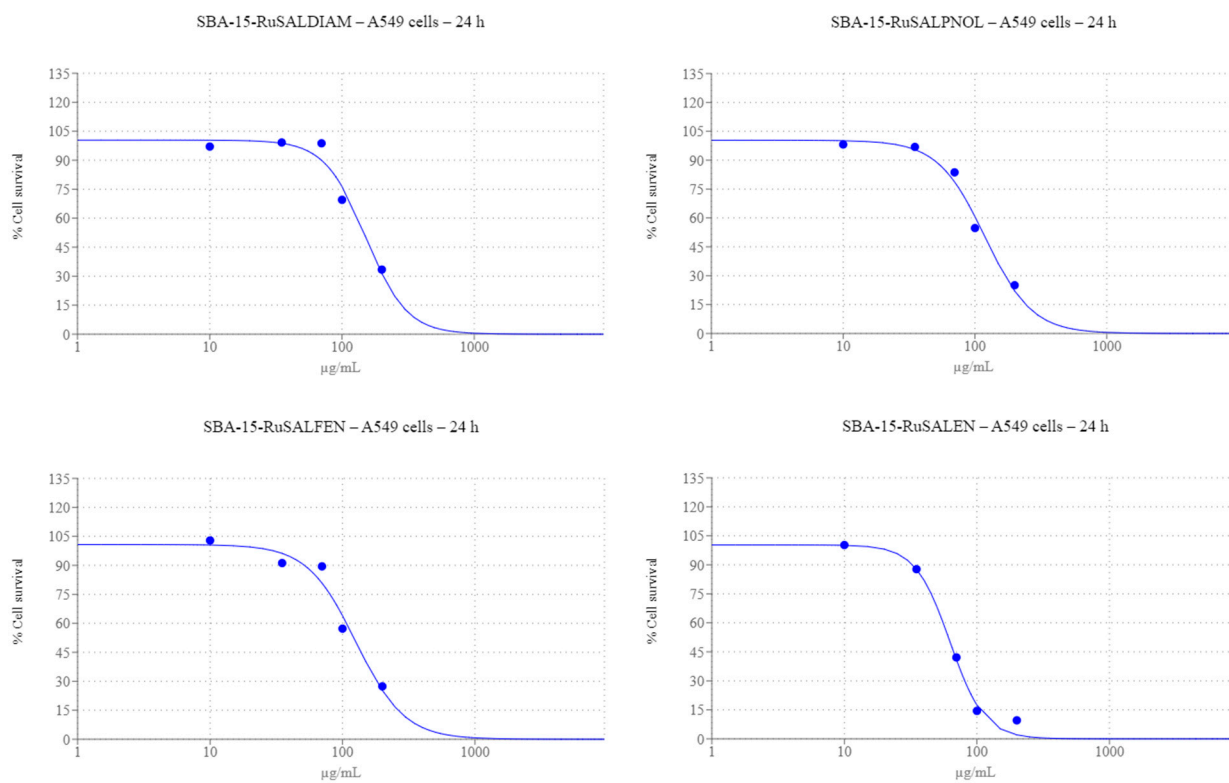

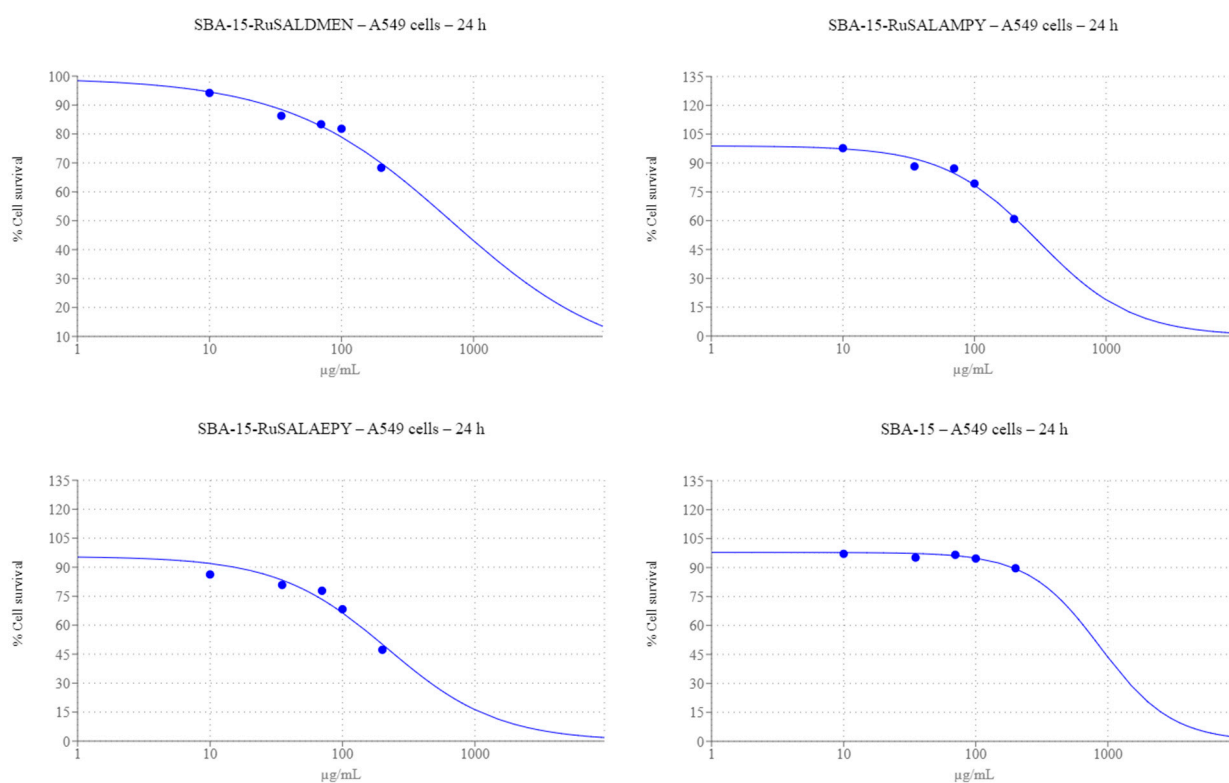

**Figure S3.** Cell survival graphs (%) obtained by MTT assay for Ru-containing hybrid materials after 24 h of incubation with A549 lung tumor cells.

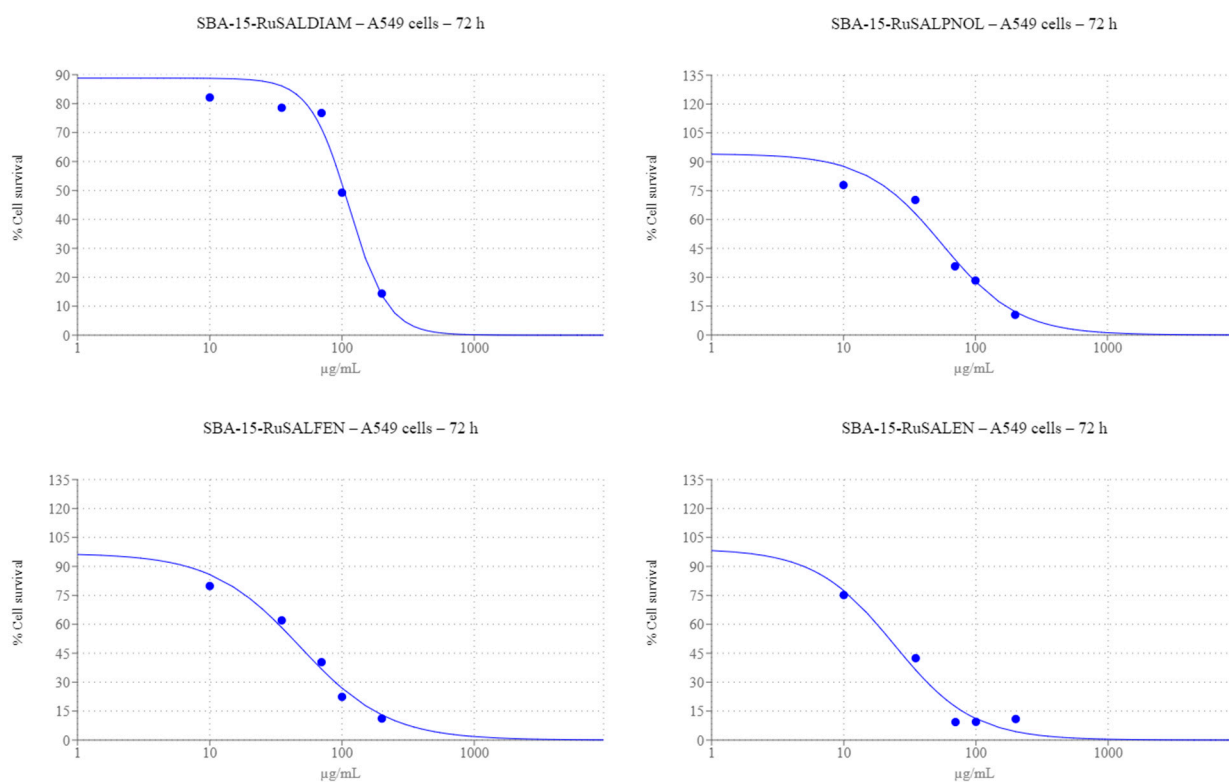

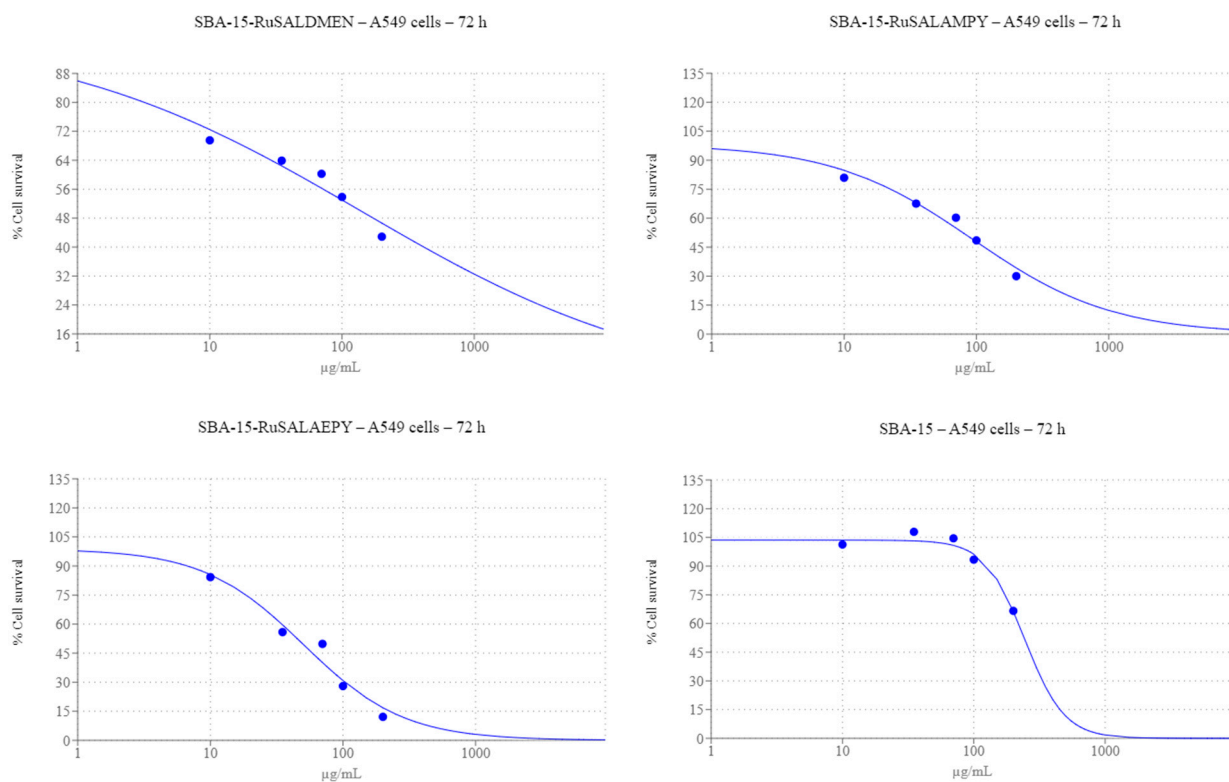

**Figure S4.** Cell survival graphs (%) obtained by MTT assay for Ru-containing hybrid materials after 72 h of incubation with A549 lung tumor cells.

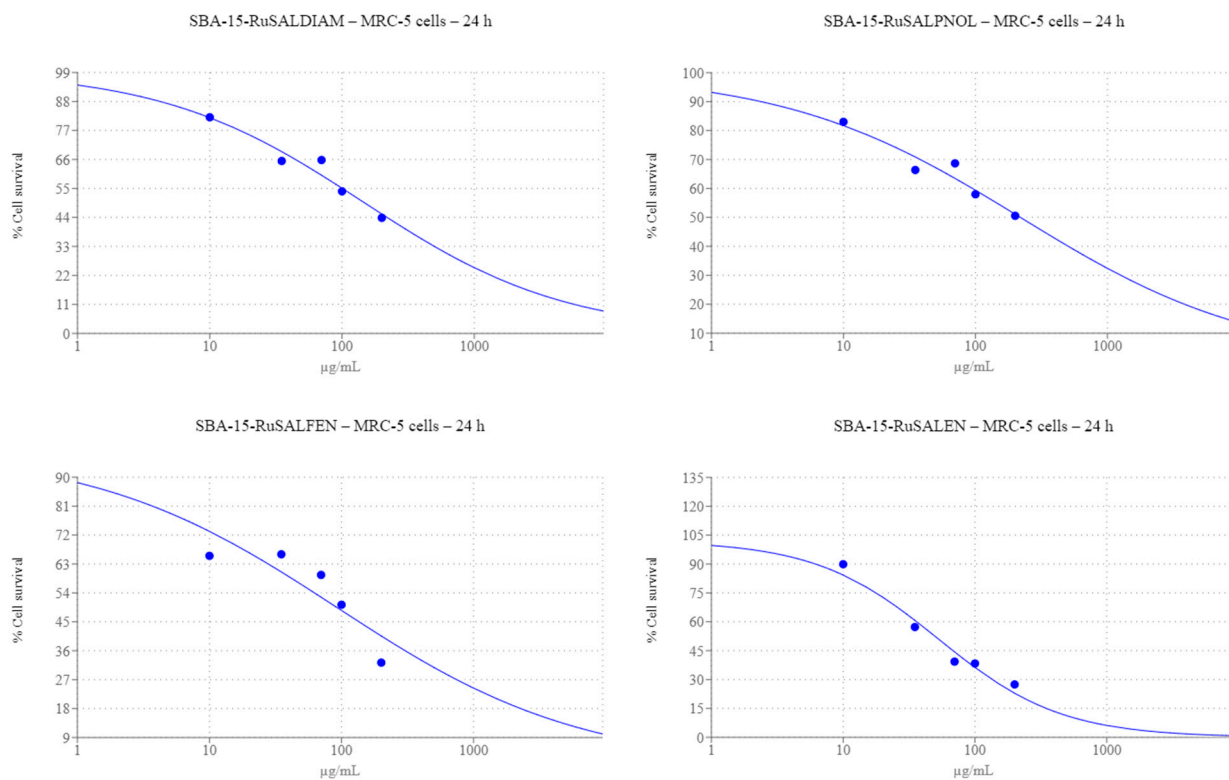



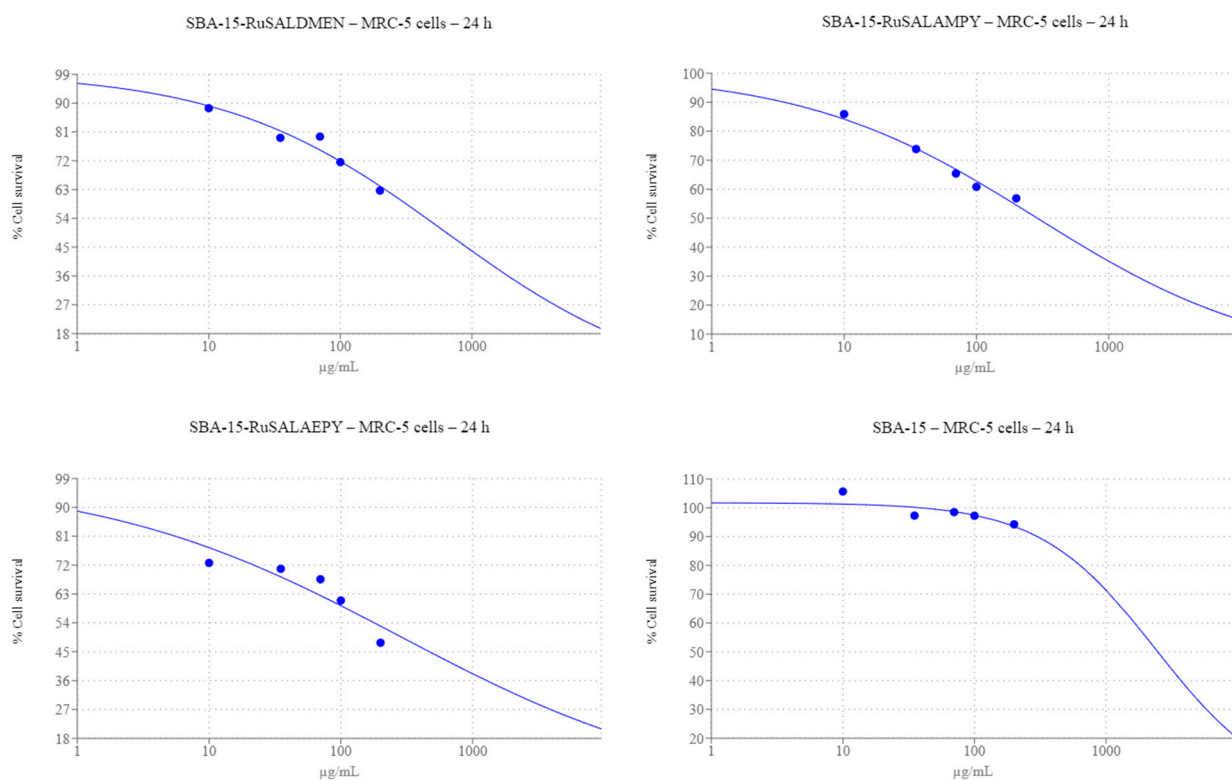

**Figure S5.** Cell survival graphs (%) obtained by MTT assay for Ru-containing hybrid materials after 24 h of incubation with MRC-5 lung non-tumoral cells.

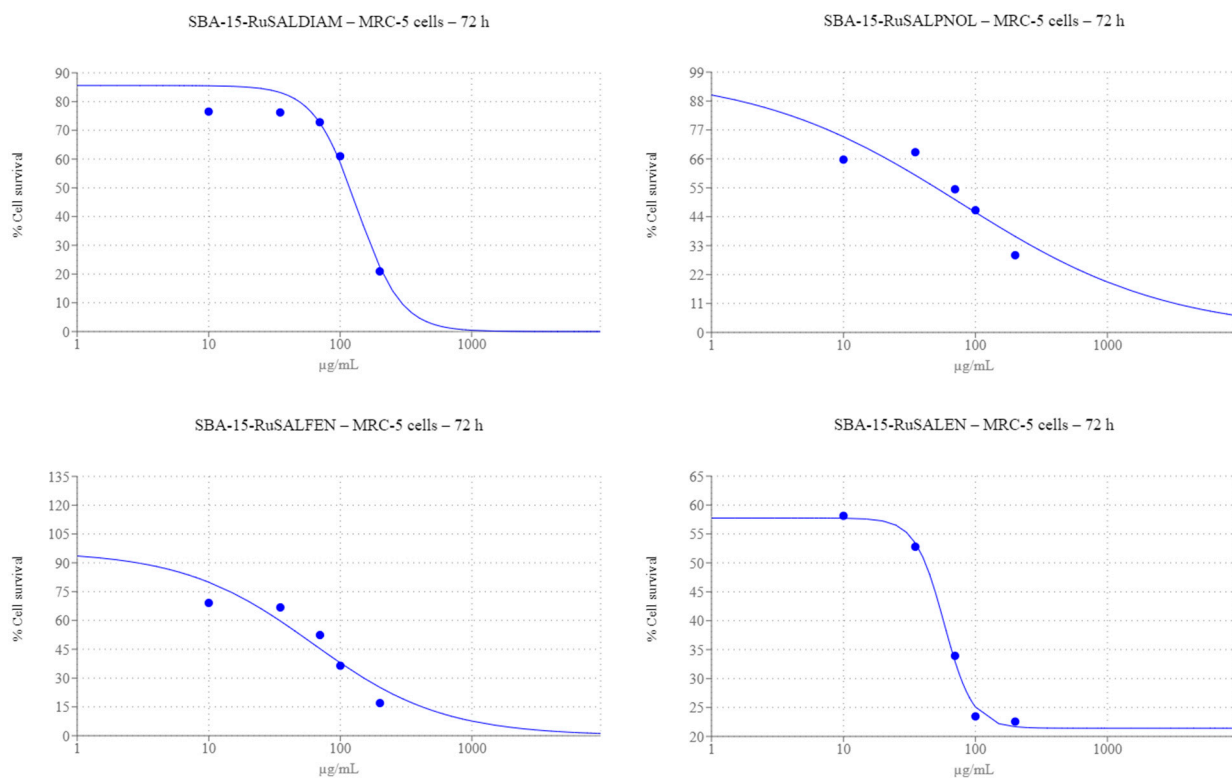



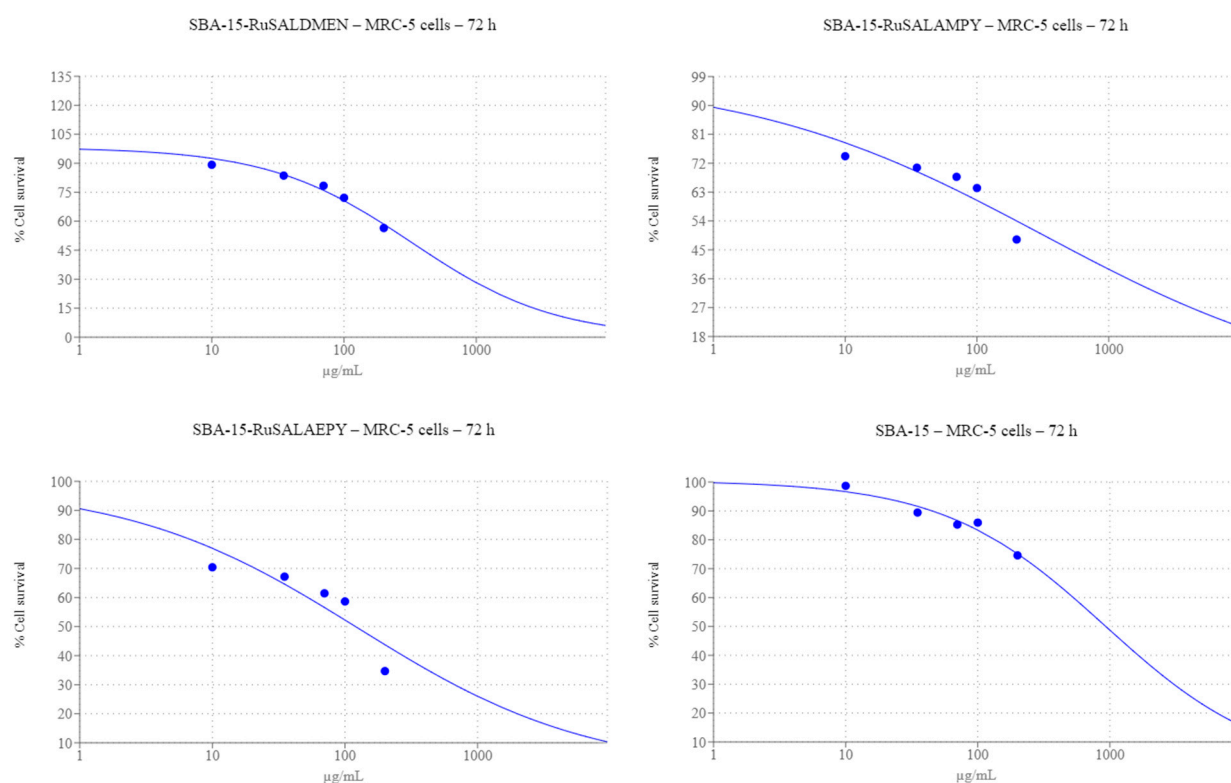

**Figure S6.** Cell survival graphs (%) obtained by MTT assay for Ru-containing hybrid materials after 72 h of incubation with MRC-5 lung non-tumoral cells.
